# Supplementary material for: A placental model of SARS-CoV-2 infection reveals ACE2-dependent susceptibility and differentiation impairment in syncytiotrophoblasts
Source: PubMed Central journal article supplement (PMC10415184; doi:10.1038/s41556-023-01182-0), 2023-07-13
Supplement: 41556_2023_1182_MOESM11_ESM.pdf [file 41556_2023_1182_MOESM11_ESM.pdf]

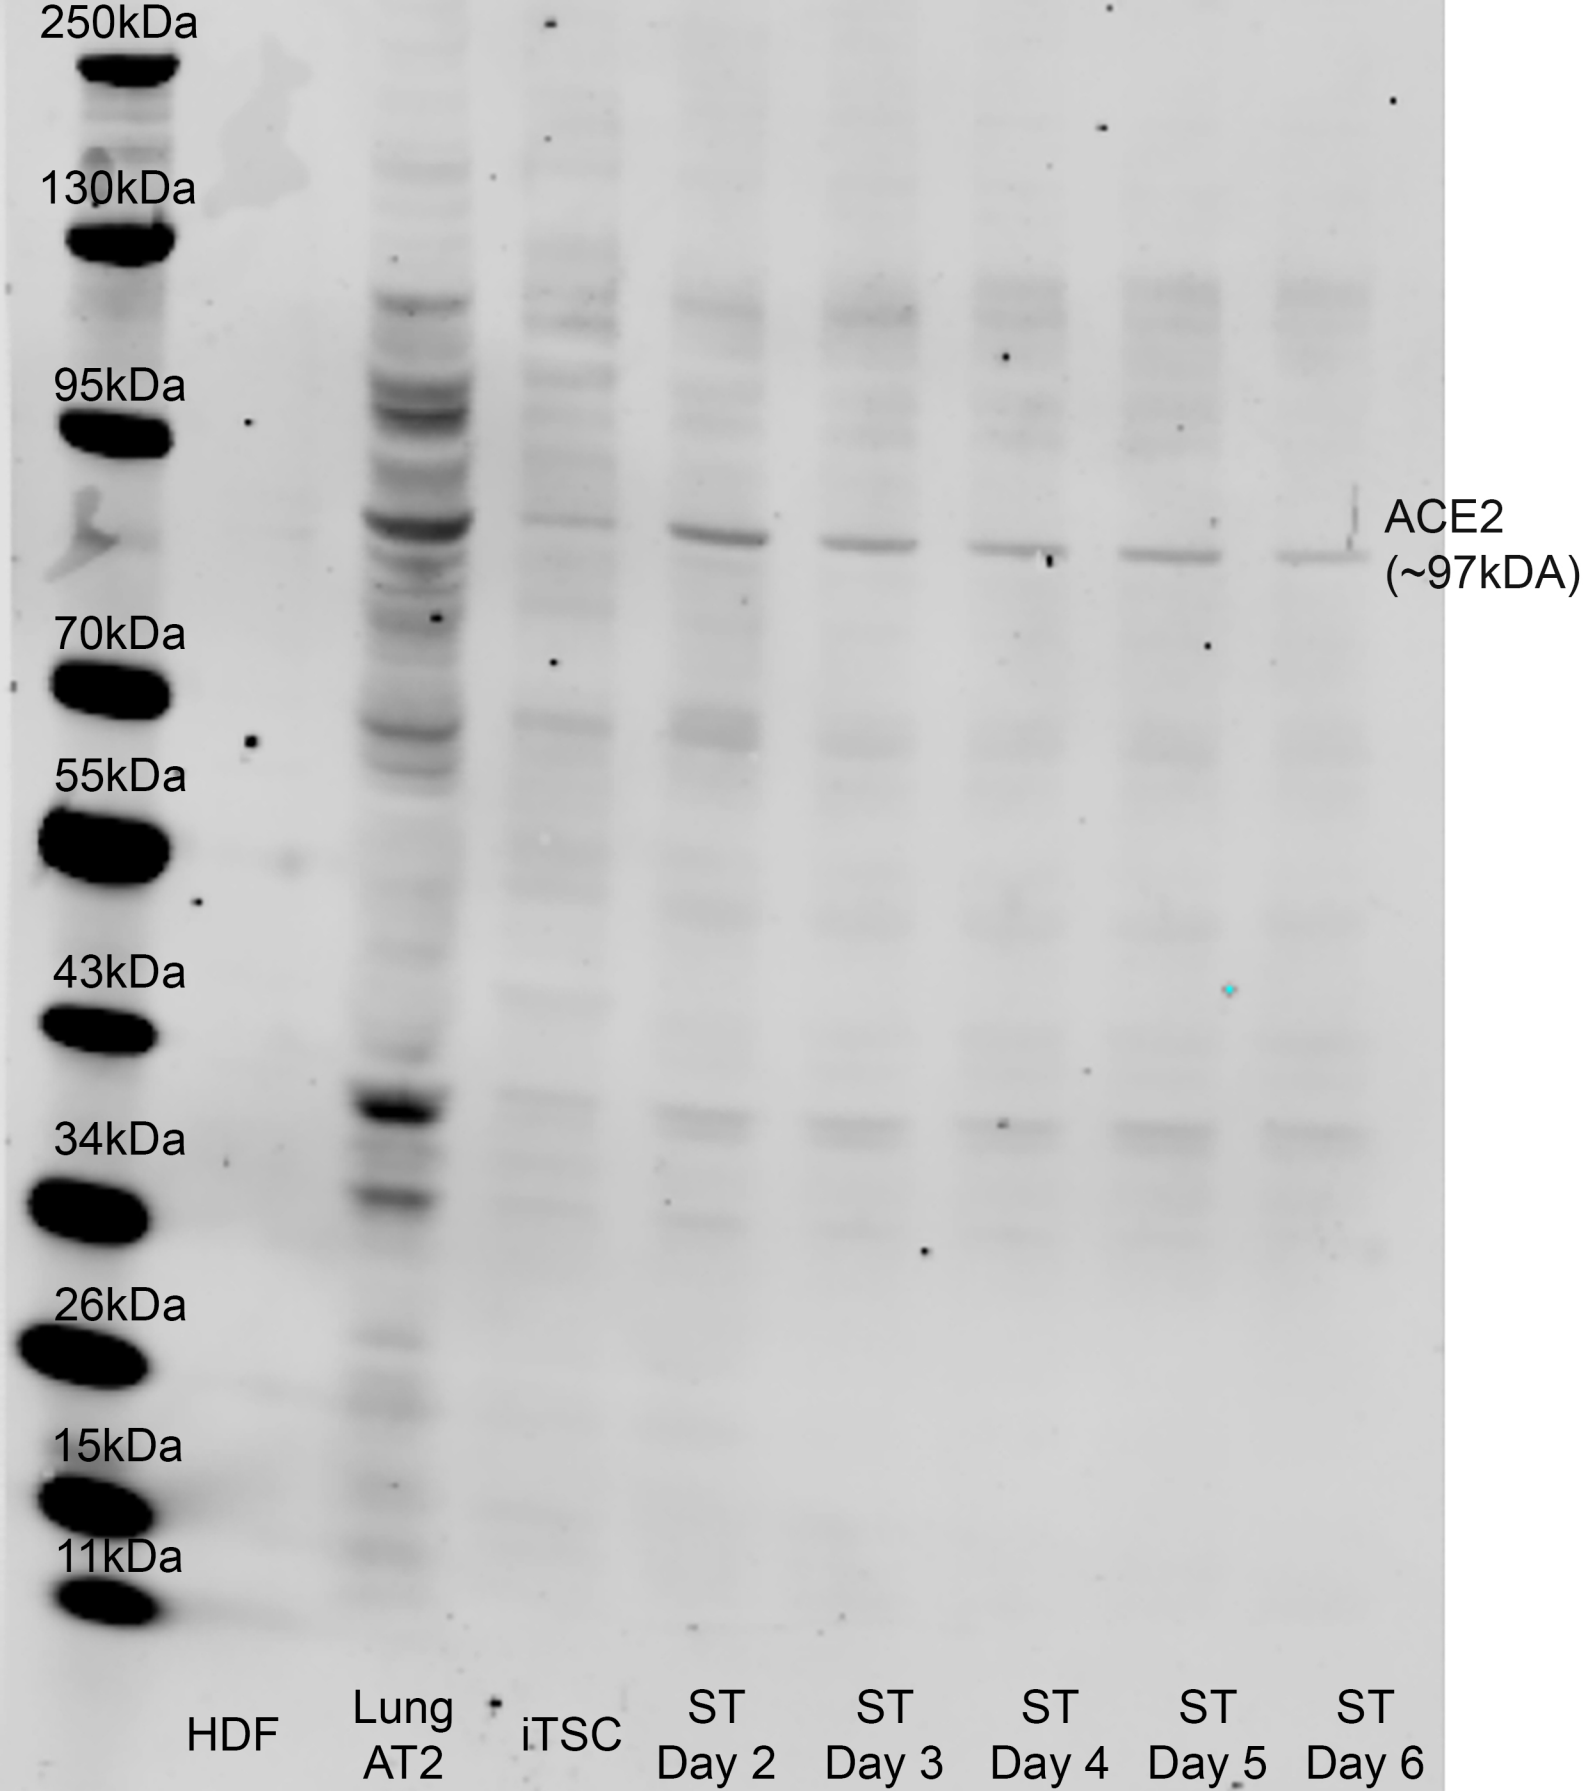

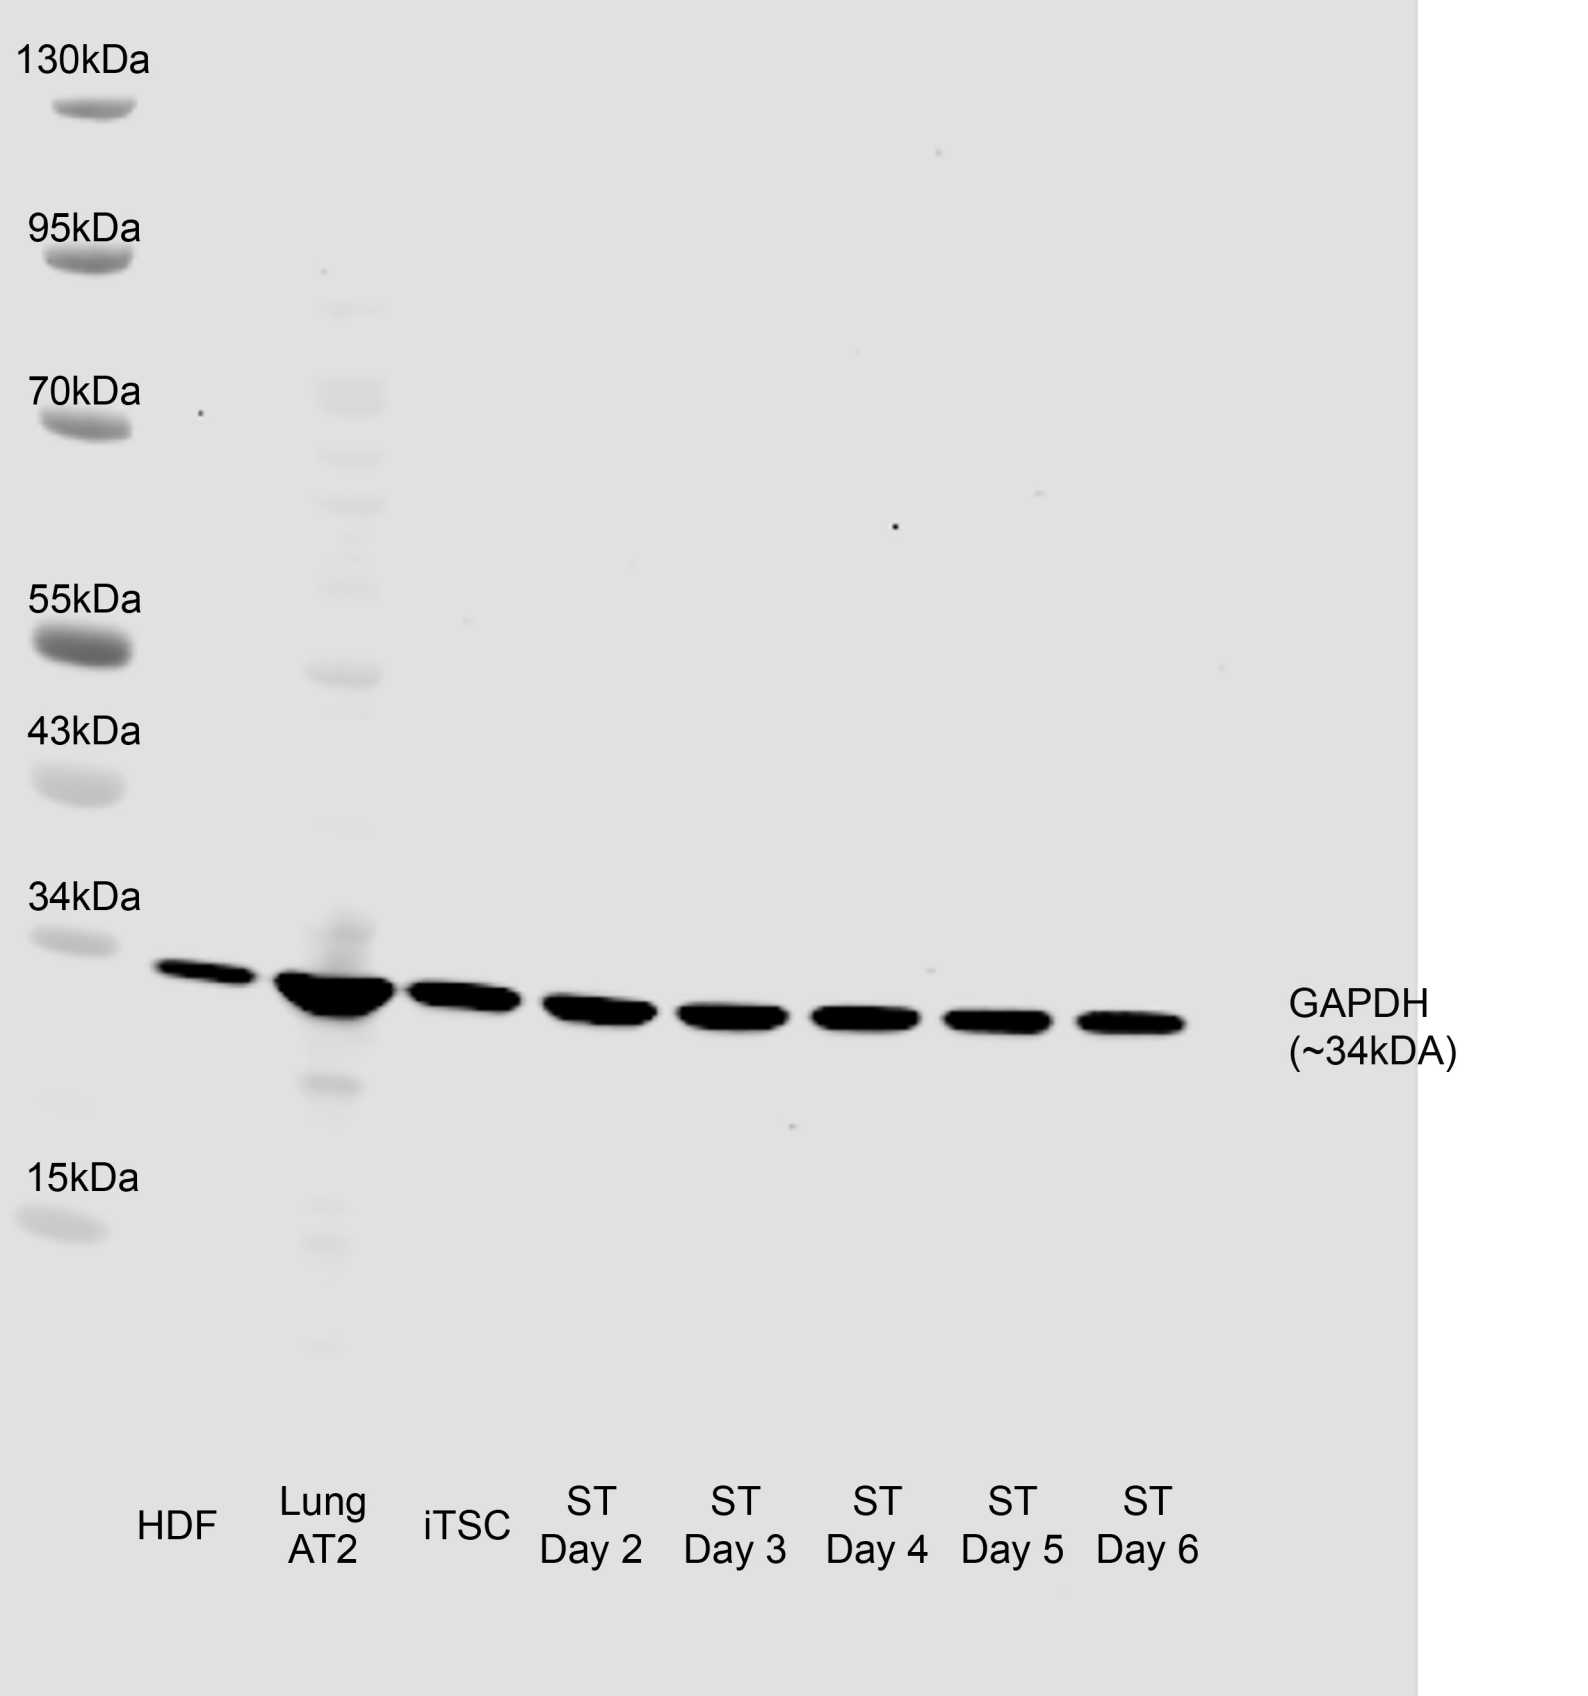

130kDa  
95kDa  
70kDa  
55kDa  
43kDa  
34kDa  
15kDa

GAPDH  
(~34kDA)

HDF Lung AT2 iTSC ST Day 2 ST Day 3 ST Day 4 ST Day 5 ST Day 6
